# Supplementary material for: Comparison of Bone Evaluation and Metal Artifact between Photon-Counting CT and Five Energy-Integrating-Detector CT under Standardized Conditions Using Cadaveric Forearms
Source: MDPI journal article supplement (doi:10.3390/diagnostics14040350), 2024-02-06
Supplement: s1 [file s1]

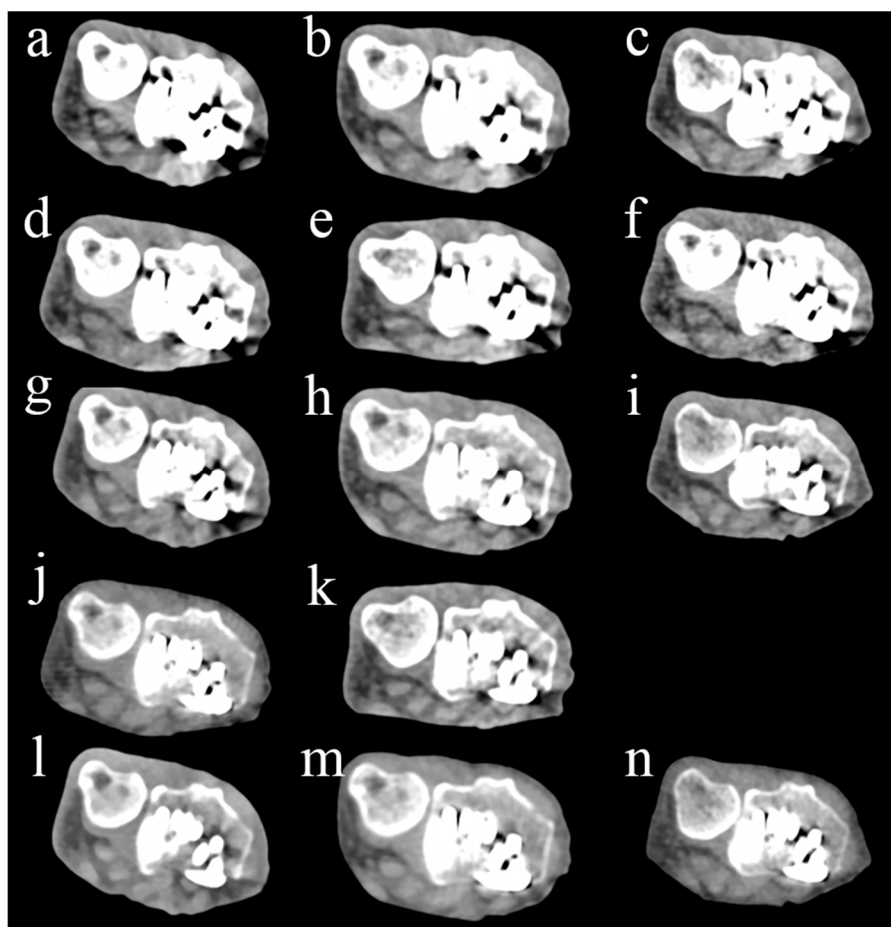

**Figure S1.** Comparison of PCCT and EIDCTs of metal artifact. Sn- image by (a) Alpha, (b) Drive, (c) Force, (d) Flash, (e) X.cite, and (f) AS. Sn+ image by (g) Alpha, (h) Drive, (i) Force, (j) Flash, and (k) X.cite. VMI by (l) Alpha, (m) Drive, and (n) Force.
